# Supplementary material for: Spintharus flavidus in the Caribbean—a 30 million year biogeographical history and radiation of a ‘widespread species’
Source: PeerJ. 2015 Nov 19;3:e1422. doi: 10.7717/peerj.1422 (PMC4655100; doi:10.7717/peerj.1422)
Supplement: Table S1 — List of specimens included in this study. [file peerj-03-1422-s001.xlsx]

## Sheet: Sheet1
Taxon	Barcode	Locality	Lattitude	Longitude
Anelosimus studiosus	N/A	N/A	N/A	N/A
Episinus nubilus	N/A	N/A	N/A	N/A
Chrysso	00003688A	SEUS	25.6143833 N	80.5844667 W
Chrysso	00004613A	SEUS	25.6143833 N	80.5844667 W
Spintharus flavidus	N/A	N/A	N/A	N/A
Spintharus flavidus	N/A	N/A	N/A	N/A
Spintharus	00004378A	Columbia	6.266275 N	77.374906 W
Spintharus	783213	Cuba	21.59166 N	77.78822 W
Spintharus	783217	Cuba	21.59166 N	77.78822 W
Spintharus	783195	Cuba	21.59166 N	77.78822 W
Spintharus	00000634A	Cuba	21.59166 N	77.78822 W
Spintharus	783215	Cuba	21.59166 N	77.78822 W
Spintharus	783228	Cuba	21.59166 N	77.78822 W
Spintharus	784754	Cuba	21.59166 N	77.78822 W
Spintharus	783208	Cuba	21.59166 N	77.78822 W
Spintharus	787441	Cuba	21.59166 N	77.78822 W
Spintharus	783202	Cuba	21.59166 N	77.78822 W
Spintharus	783216	Cuba	21.59166 N	77.78822 W
Spintharus	784389	Cuba	22.65707 N	83.70161 W
Spintharus	783199	Cuba	21.59166 N	77.78822 W
Spintharus	00004338A	Cuba	20.146708 N	76.948864 W
Spintharus	00004292A	Cuba	20.146708 N	76.948864 W
Spintharus	782945	Cuba	20.05269 N	76.50296 W
Spintharus	05111A	Cuba	20.146708 N	76.948864 W
Spintharus	00004718A	Cuba	20.146708 N	76.948864 W
Spintharus	00004067A	Cuba	20.146708 N	76.948864 W
Spintharus	00004619A	Cuba	20.146708 N	76.948864 W
Spintharus	787473	Cuba	19.574210 N	75.425991 W
Spintharus	783230	Cuba	19.574210 N	75.425991 W
Spintharus	787464	Cuba	19.574210 N	75.425991 W
Spintharus	787467	Cuba	19.574210 N	75.425991 W
Spintharus	787462	Cuba	19.574210 N	75.425991 W
Spintharus	784486	Cuba	20.33178 N	74.56919 W
Spintharus	785288	Cuba	20.33178 N	74.56919 W
Spintharus	787848	Cuba	20.34501 N	74.56642 W
Spintharus	00003854A	Cuba	20.576247 N	75.667434 W
Spintharus	787471	Cuba	19.574210 N	75.425991 W
Spintharus	00004279A	Cuba	20.576247 N	75.667434 W
Spintharus	00004001A	Cuba	20.576247 N	75.667434 W
Spintharus	784459	Cuba	19.574210 N	75.425991 W
Spintharus	787781	Cuba	20.33178 N	74.56919 W
Spintharus	787855	Cuba	20.34501 N	74.56642 W
Spintharus	00004302A	Cuba	20.346554 N	74.498651 W
Spintharus	787854	Cuba	20.34501 N	74.56642 W
Spintharus	00004296A	Cuba	20.346554 N	74.498651 W
Spintharus	00004330A	Cuba	20.346554 N	74.498651 W
Spintharus	787851	Cuba	20.34501 N	74.56642 W
Spintharus	785195	Cuba	20.34501 N	74.56642 W
Spintharus	787849	Cuba	20.34501 N	74.56642 W
Spintharus	787852	Cuba	20.34501 N	74.56642 W
Spintharus	782941	Cuba	20.05269 N	76.50296 W
Spintharus	00004866A	Cuba	20.146708 N	76.948864 W
Spintharus	00004592A	Cuba	20.056595 N	76.764844 W
Spintharus	782943	Cuba	20.05269 N N	76.50296 W
Spintharus	00005538A	Cuba	20.146708 N	76.948864 W
Spintharus	00005478A	Cuba	20.146708 N	76.948864 W
Spintharus	00005529A	Cuba	20.056595 N	76.764844 W
Spintharus	00004082A	Cuba	20.146708 N	76.948864 W
Spintharus	00004712A	Cuba	20.146708 N	76.948864 W
Spintharus	00004402A	Cuba	20.146708 N	76.948864 W
Spintharus	782935	Cuba	20.05269 N	76.50296 W
Spintharus	00005066A	Cuba	20.146708 N	76.948864 W
Spintharus	00004590A	Cuba	20.056595 N	76.764844 W
Spintharus	00005537A	Cuba	20.146708 N	76.948864 W
Spintharus	00004609A	Cuba	20.146708 N	76.948864 W
Spintharus	00005546A	Cuba	20.146708 N	76.948864 W
Spintharus	785156	Cuba	20.05269 N	76.50296 W
Spintharus	00004856A	Cuba	20.146708 N	76.948864 W
Spintharus	00005528A	Cuba	20.146708 N	76.948864 W
Spintharus	00000308A	Cuba	20.056595 N	76.764844 W
Spintharus	00004623A	Cuba	20.056595 N	76.764844 W
Spintharus	00004834A	Cuba	20.146708 N	76.948864 W
Spintharus	00005175A	Cuba	20.056595 N	76.764844 W
Spintharus	00005007A	Cuba	20.056595 N	76.764844 W
Spintharus	00004288A	Cuba	20.056595 N	76.764844 W
Spintharus	782948	Cuba	20.05269 N	76.50296 W
Spintharus	782946	Cuba	20.05269 N	76.50296 W
Spintharus	00004099A	Cuba	20.056595 N	76.764844 W
Spintharus	00004173A	Cuba	20.011433 N	75.626927 W
Spintharus	00004741A	Cuba	20.056595 N	76.764844 W
Spintharus	00004621A	Cuba	20.056595 N	76.764844 W
Spintharus	00004604A	Cuba	20.146708 N	76.948864 W
Spintharus	00005540A	Cuba	20.056595 N	76.764844 W
Spintharus	00004710A	Cuba	20.056595 N	76.764844 W
Spintharus	785744	Hispaniola	19.34405 N	69.46635 W
Spintharus	785768	Hispaniola	19.34405 N	69.46635 W
Spintharus	785670	Hispaniola	19.34405 N	69.46635 W
Spintharus	784899	Hispaniola	19.34405 N	69.46635 W
Spintharus	785738	Hispaniola	19.34405 N	69.46635 W
Spintharus	785127	Hispaniola	19.34405 N	69.46635 W
Spintharus	784667	Hispaniola	19.34405 N	69.46635 W
Spintharus	785388	Hispaniola	19.34405 N	69.46635 W
Spintharus	785583	Hispaniola	19.34405 N	69.46635 W
Spintharus	786969	Hispaniola	18.82208 N	070.6838 W
Spintharus	787094	Hispaniola	19.0375 N	70.96918 W
Spintharus	786990	Hispaniola	18.82208 N	070.6838 W
Spintharus	786961	Hispaniola	18.82208 N	070.6838 W
Spintharus	786970	Hispaniola	18.82208 N	070.6838 W
Spintharus	787077	Hispaniola	19.0375 N	70.96918 W
Spintharus	786971	Hispaniola	18.82208 N	070.6838 W
Spintharus	787256	Hispaniola	19.05116 N	70.88866 W
Spintharus	787272	Hispaniola	19.05116 N	70.88866 W
Spintharus	787259	Hispaniola	19.05116 N	70.88866 W
Spintharus	787310	Hispaniola	19.05116 N	70.88866 W
Spintharus	787316	Hispaniola	19.03627 N	70.54337 W
Spintharus	782898	Hispaniola	19.03627 N	70.54337 W
Spintharus	787274	Hispaniola	19.03627 N	70.54337 W
Spintharus	00003068A	Jamaica	18.3476944 N	077.6415833 W
Spintharus	00003503A	Jamaica	18.3561667 N	077.6468611 W
Spintharus	00003476A	Jamaica	18.3561667 N	077.6468611 W
Spintharus	00003738A	Jamaica	18.3040444 N	077.5711139 W
Spintharus	00003814A	Jamaica	18.08903 N	76.7276
Spintharus	00003731A	Jamaica	18.3040444 N	077.5711139 W
Spintharus	00003150A	Jamaica	18.3561667 N	077.6468611 W
Spintharus	00003602A	Jamaica	18.3040444 N	077.5711139 W
Spintharus	00003721A	Jamaica	18.3040444 N	077.5711139 W
Spintharus	00001773A	Grenada	12.09501 N	61.6950 W
Spintharus	00001606A	Grenada	12.09501 N	61.6950 W
Spintharus	00001800A	St Lucia	13.96448 N	60.94473 W
Spintharus	00001826A	St Lucia	13.96448 N	60.94473 W
Spintharus	00001824A	St Lucia	13.96448 N	60.94473 W
Spintharus	00001661A	St Lucia	13.96448 N	60.94473 W
Spintharus	00001712A	St Lucia	13.96362 N	60.93018 W
Spintharus	00002152A	Dominica	15.52394 N	61.42049 W
Spintharus	00000550A	Nevis	17.14145 N	062.57784 W
Spintharus	00001452A	St Kitts	17.340483 N	062.7410389 W
Spintharus	00000173A	Nevis	17.14145 N	062.57784 W
Spintharus	00000648A	Nevis	17.14145 N	062.57784 W
Spintharus	00000166A	Nevis	17.14145 N	062.57784 W
Spintharus	00001408A	St Kitts	17.340483 N	062.7410389 W
Spintharus	00001536A	St Kitts	17.340483 N	062.7410389 W
Spintharus	00001460A	St Kitts	17.340483 N	062.7410389 W
Spintharus	00001596A	St Kitts	17.340483 N	062.7410389 W
Spintharus	00006359A	Mexico	17.72453 N	92.5834 W
Spintharus	00006162A	Mexico	17.72453 N	92.5834 W
Spintharus	00006461A	Mexico	17.72453 N	92.5834 W
Spintharus	00006496A	Mexico	17.72453 N	92.5834 W
Spintharus	00006490A	Mexico	17.72453 N	92.5834 W
Spintharus	00006305A	Mexico	17.72453 N	92.5834 W
Spintharus	00006449A	Mexico	17.72453 N	92.5834 W
Spintharus	00006462A	Mexico	17.72453 N	92.5834 W
Spintharus	00006293A	Mexico	17.72453 N	92.5834 W
Spintharus	00006489A	Mexico	17.72453 N	92.5834 W
Spintharus	0006495A	Mexico	17.72453 N	92.5834 W
Spintharus	00006349A	Mexico	20.33378 N	87.3886 W
Spintharus	00006443A	Mexico	20.33378 N	87.3886 W
Spintharus	392822	Puerto Rico	18.321688 N	65.819908 W
Spintharus	782101	Puerto Rico	18.172979 N	66.491798 W
Spintharus	392769	Puerto Rico	18.308701 N	65.7752 W
Spintharus	392949	Puerto Rico	18.321688 N	65.819908 W
Spintharus	392972	Puerto Rico	18.321688 N	65.819908 W
Spintharus	392974	Puerto Rico	18.321688 N	65.819908 W
Spintharus	392973	Puerto Rico	18.321688 N	65.819908 W
Spintharus	392857	Puerto Rico	18.321688 N	65.819908 W
Spintharus	392953	Puerto Rico	18.318779 N	65.770744 W
Spintharus	392878	Puerto Rico	18.321688 N	65.819908 W
Spintharus	392889	Puerto Rico	18.295744 N	65.790649 W
Spintharus	392921	Puerto Rico	18.321688 N	65.819908 W
Spintharus	00004634A	USA	28.3238 N	80.8319 W
Spintharus	00004867A	USA	28.3238 N	80.8319 W
Spintharus	00005090A	USA	28.3238 N	80.8319 W
Spintharus	00004597A	USA	28.3238 N	80.8319 W
Spintharus	00004624A	USA	28.3238 N	80.8319 W
Spintharus	00004608A	USA	28.3238 N	80.8319 W
Spintharus	00004701A	USA	28.3238 N	80.8319 W
Spintharus	00004730A	USA	28.3238 N	80.8319 W
Spintharus	00004511A	USA	28.3238 N	80.8319 W
Spintharus	00003462A	USA	29.46368 N	82.52898 W
Spintharus	00003469A	USA	28.3238 N	80.8319 W
Spintharus	00003914A	USA	28.3238 N	80.8319 W
Spintharus	00003848A	USA	29.46368 N	82.52898 W
Spintharus	00003819A	USA	29.46368 N	82.52898 W
Spintharus	00004717A	USA	28.3238 N	80.8319 W
Spintharus	00003308A	USA	28.3238 N	80.8319 W
Spintharus	00003938A	USA	28.3238 N	80.8319 W
Spintharus	00001078A	USA	29.61958 N	82.3066 W
Spintharus	00001223A	USA	33.03907 N	79.56458 W
Spintharus	00001233A	USA	33.03907 N	79.56458 W
Spintharus	00000365A	USA	33.03913 N	79.56459 W
Spintharus	00001029A	USA	29.61958 N	82.3066 W
Spintharus	00000858A	USA	33.03913 N	79.56459 W
Spintharus	00001126A	USA	29.61958 N	82.3066 W
Spintharus	00001157A	USA	29.62688 N	82.29878 W
Spintharus	00001117A	USA	29.46368 N	82.52898 W
Spintharus	00003712A	USA	28.3238 N	80.8319 W
Spintharus	00001262A	USA	33.03907 N	79.56458 W
Spintharus	00001054A	USA	36.03366 N	82.42514 W
Spintharus	00000389A	USA	33.03913 N	79.56459 W
Spintharus	00000686A	USA	33.03907 N	79.56458 W
Spintharus	00000153A	USA	33.03913 N	79.56459 W
Spintharus	00000828A	USA	33.03913 N	79.56459 W
Spintharus	00003926A	USA	29.46368 N	82.52898 W
